# Supplementary material for: Seeded preparation of ultrathin FeS2nanosheets from Fe3O4nanoparticles
Source: Royal Society of Chemistry journal article supplement (doi:10.1039/c6nr02211a), 2016-01-01
Supplement: c6nr02211a1.pdf [file c6nr02211a1.pdf]

## **Supporting Information:**

### **Seeded Preparation of Ultrathin FeS<sub>2</sub> Nanosheets from Fe<sub>3</sub>O<sub>4</sub> Nanoparticles**

Tingting Li,<sup>a,b</sup> Huiwen Liu,<sup>b</sup> Zhennan Wu,<sup>b</sup> Yi Liu,<sup>b</sup> Zuoxing Guo<sup>a</sup> and Hao Zhang<sup>\*b</sup>

<sup>a</sup> Key Laboratory of Automobile Materials, Ministry of Education, College of Materials Science and Engineering, Jilin University, Changchun 130012, P. R. China.

<sup>b</sup> State Key Laboratory of Supramolecular Structure and Materials, College of Chemistry, Jilin University, Changchun 130012, P. R. China.

\* E-mail: hao\_zhang@jlu.edu.cn

## Experimental Section

**Materials.** Ferric acetylacetonate ( $\text{Fe}(\text{acac})_3$ , 99.9%) and ammonium thiomolybdate ( $(\text{NH}_4)_2\text{MoS}_4$ ) were purchased from Aldrich. Octadecylamine (ODA, 90%), diphenyl ether (DE, 99%), and oleylamine (OLA, 90%) were obtained from Aladdin. Sulfur powder (S), acetone, *N,N*-Dimethylformamide (DMF) and chloroform were all commercially available products and used as received without further purification.

**Preparation of  $\text{Fe}_3\text{O}_4$  nanoparticles (NPs).**  $\text{Fe}(\text{acac})_3$  (176 mg, 0.5 mmol), 7.5 mL ODA, and 2.5 mL OLA were mixed in a four-necked flask at 120 °C and degassed under vacuum for 1 h to produce Fe precursor solution. After further heating and annealing treatment at 200 °C for 1 h, the uniform  $\text{Fe}_3\text{O}_4$  NPs with the average diameter of  $3.9 \pm 0.6$  nm were obtained. As heating and annealing treatment at 200 °C for 10 min, heterogeneous  $\text{Fe}_3\text{O}_4$  NPs with the diameter of  $3.8 \pm 1.6$  nm were obtained.

**Preparation and purification of ultrathin  $\text{FeS}_2$  nanosheets.** S (144 mg, 4.5 mmol) and 5 mL DE were mixed in another three-necked flask at 70 °C and degassed for 1 h to produce the S solution. Subsequently, the S solution was rapidly injected into the  $\text{Fe}_3\text{O}_4$  NPs ODA/OLA solution and maintained at 200 °C for 60 min to produce ultrathin  $\text{FeS}_2$  nanosheets. After cooled down to room temperature, 1 mL  $\text{FeS}_2$  nanosheets solution were washed and precipitated through the addition of 1 mL chloroform and 2 mL acetone for two times. Separated by centrifugation, the precipitates were collected and dispersed in 1 mL chloroform. In control experiment, the products were prepared by the same experimental procedure, except injecting the S solution at 220 °C (Figure S10) and 240 °C (Figure S11). To reveal the influence of coordinative solvent, the products were prepared with the ODA/OLA volume ratio of 1/3, while other experimental variables were fixed (Figure S12).

**Preparation and purification of 8.3 nm  $\text{FeS}_2$  NPs.** Pyrite NPs were prepared by

injecting S solution (96 mg S in 5 mL DE) into Fe solution (100 mg  $\text{FeCl}_2 \cdot 6\text{H}_2\text{O}$  in 10 mL ODA) at 220 °C and stirring for 3 h. 1 mL resultant solution were washed and precipitated through the addition of 1 mL chloroform and 2 mL acetone for two times at room temperature. Separated by centrifugation, the precipitates were collected and dispersed in 1 mL chloroform.

**Preparation of ultrathin 2H-MoS<sub>2</sub> nanosheets.** Edge-rich 2H-MoS<sub>2</sub> ultrathin nanosheets were prepared according to the previous publication (*ACS Appl. Mater. Interfaces* 2013, 5, 12794-12798). 5 mg  $(\text{NH}_4)_2\text{MoS}_4$  was foremost dispersed in the mixture of 2 mL DMF and 1 mL H<sub>2</sub>O by ultra-sonication for 30 min. The mixture was then transferred into an autoclave, and maintained at 210 °C for 18 h. After cooled down to room temperature, the products were collected and treated by water and ethanol three times, and finally dried at 60 °C for 24 h.

**Characterization.** UV-visible (UV-vis) absorption spectra were measured using a 3600 UV-VIS-near infrared (NIR) spectrophotometer (Shimadzu). Transmission electron microscopy (TEM) and selected area electron diffraction (SAED) were recorded using a H-800 electron microscope (Hitachi) at an acceleration voltage of 200 kV with a charged coupled device camera. High-resolution TEM (HRTEM) images were recorded using a JEM-2100F electron microscope (Jeol) at 200 kV. An energy-dispersive X-ray spectroscopy (EDX) detector coupled with a XL30 ESEM FEG scanning electron microscope (FEI) was used for elemental analysis. Inductively coupled plasma (ICP) was performed with an OPTIMA 3300 DV analyzer (PerkinElmer). X-ray diffraction (XRD) was carried out on a X-ray diffractometer (Rigaku) using CuK radiation ( $\lambda = 1.5418 \text{ \AA}$ ).

**Electrochemistry.** A conventional three-electrode cell was employed to perform the electrochemical test. The working electrode was a 5 mm diameter glassy carbon that was carefully polished and ultrasonically rinsed in absolute ethanol before use. The counter electrode was a platinum wire, and the reference electrode was an aqueous

Ag/AgCl electrode in saturated KCl solution. All of the potentials were referred to NHE by adding +0.197 V to the potential vs Ag/AgCl electrode. 0.02 mg Catalysts, including FeS<sub>2</sub> NPs, nanoplates, nanosheets, and 2H-MoS<sub>2</sub> nanosheets were deposited on the electrode surface, respectively. And then dried in air and left for 12 h at 100 °C in an oven. A 0.025 mol/L phosphate buffer (pH 7.0) was prepared and used as the supporting electrolyte.

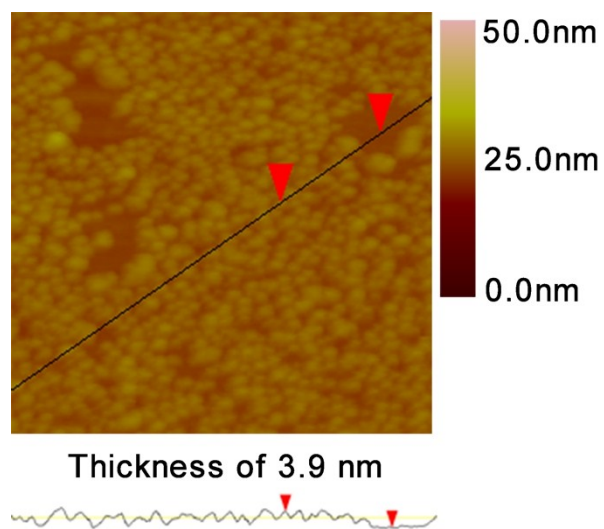

**Figure S1.** AFM image of  $\text{Fe}_3\text{O}_4$  seeds. The average diameter is 3.9 nm.

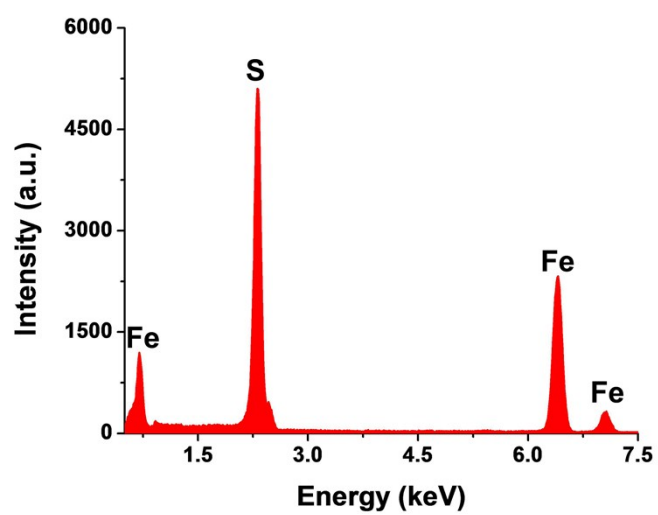

**Figure S2.** The composition of as-prepared FeS<sub>2</sub> nanosheets is characterized by EDX, which shows the Fe/S molar ratio of 1/2.

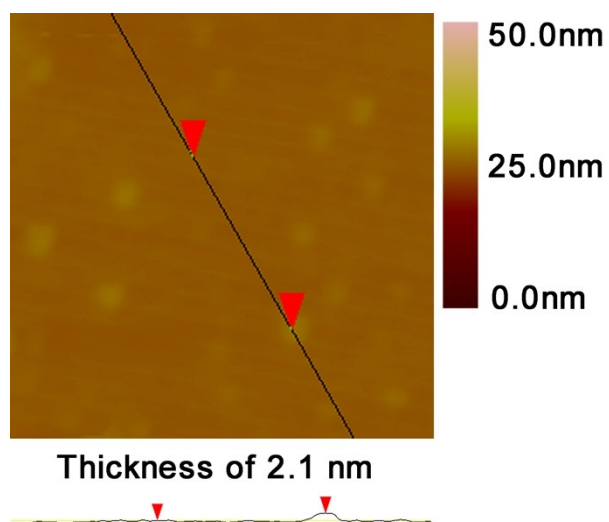

**Figure S3.** AFM image of FeS<sub>2</sub> nanosheets, those are prepared at 200 °C for 1 h. The thickness of nanosheets is 2.1 nm.

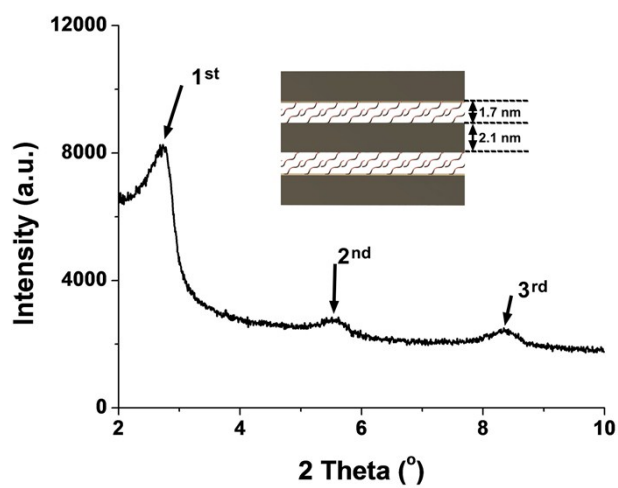

**Figure S4.** The small-angle XRD pattern of ultrathin FeS<sub>2</sub> nanosheets, which reveals a set of distinct peaks corresponding to the spacing of 3.8 nm, which consists with the sum of FeS<sub>2</sub> nanosheets (2.1 nm) and the thickness of ligand bilayer (1.7 nm).



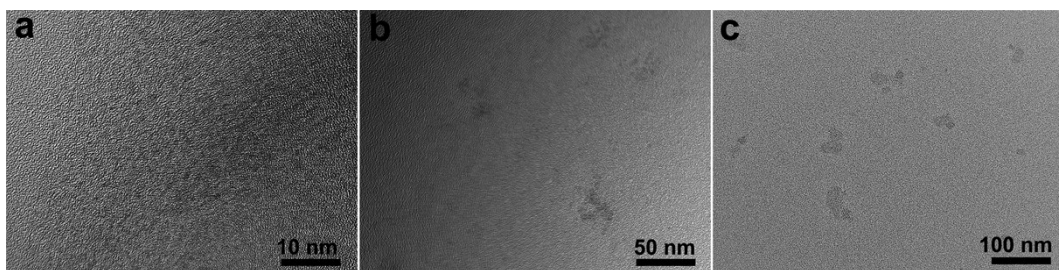

**Figure S5.** TEM temporal evolution of FeS<sub>2</sub> nanosheets after injection of S solution for 5 (a), 10 (b), and 20 (c) min, which exhibits the tendency of the aggregation of small FeS<sub>2</sub> nuclei.

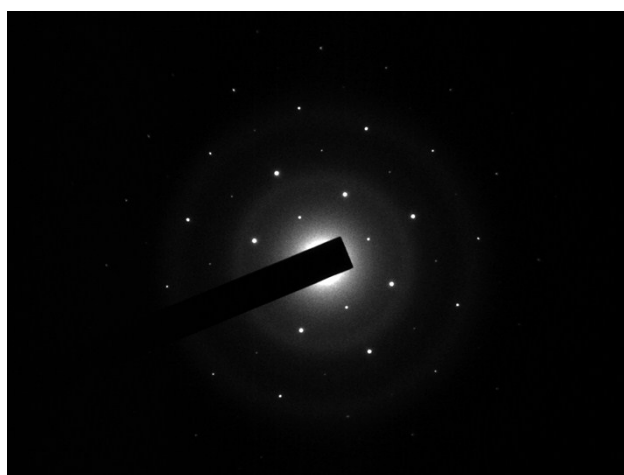

**Figure S6.** The SAED pattern of one FeS<sub>2</sub> nanosheet, which presents the single-crystalline feature.

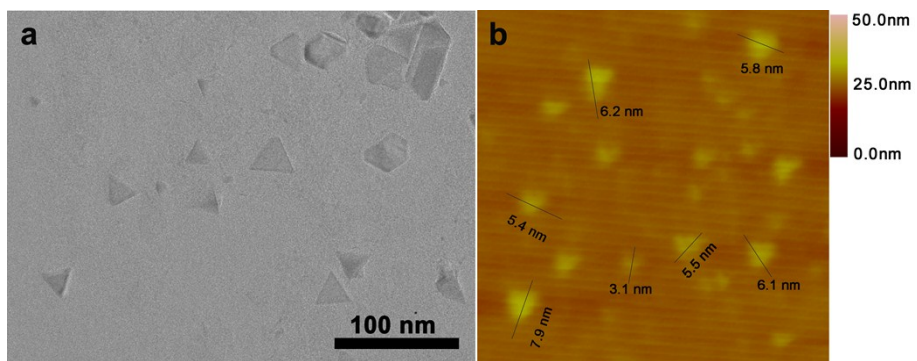

**Figure S7.** TEM (a) and AFM (b) images of the inhomogeneous FeS<sub>2</sub> nanoplates with different thickness. The average thickness of the nanoplates is 5.7 nm.

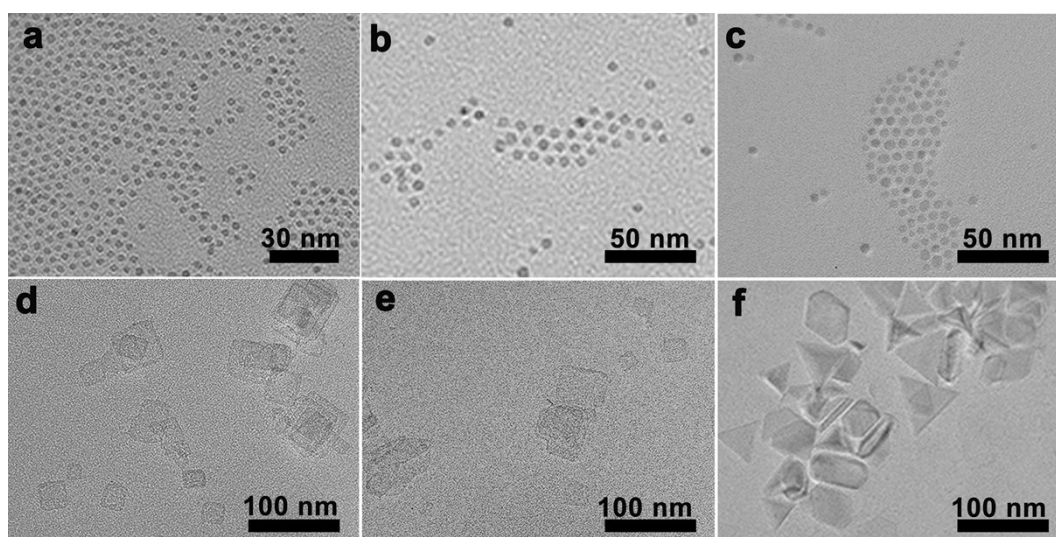

**Figure S8.** TEM images of  $\text{Fe}_3\text{O}_4$  seeds with the average diameter of 3 nm (a), 5 nm (b), and the mixed seeds (c), which produce the corresponding  $\text{FeS}_2$  nanostructures of ultrathin sheets (d-e) and inhomogeneous plates (f).

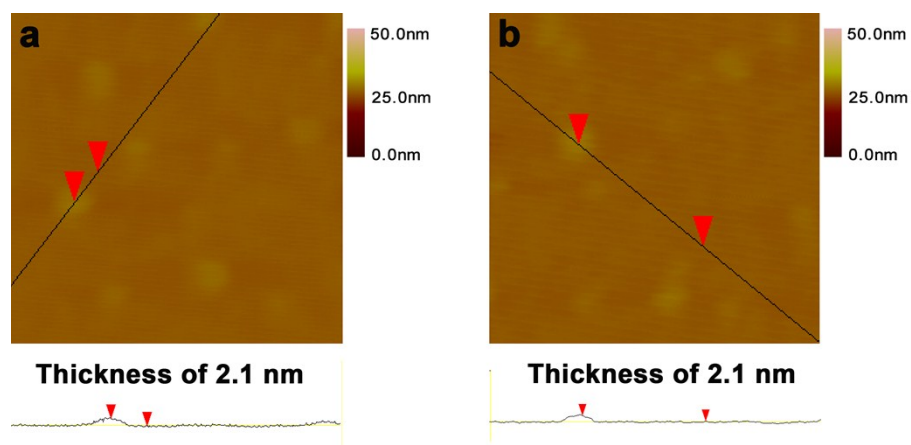

**Figure S9.** AFM images of the FeS<sub>2</sub> nanosheets that are produced from 3 nm (a) and 5 nm (b) Fe<sub>3</sub>O<sub>4</sub> seeds. The thickness is 2.1 nm. The corresponding TEM images are respectively shown in Figure S8d and e.

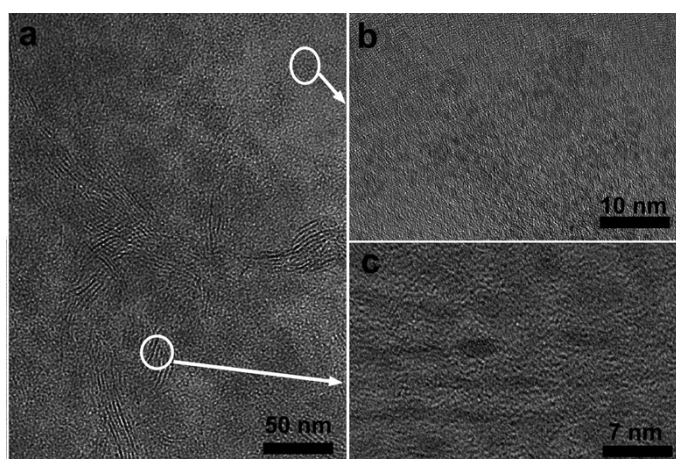

**Figure S10.** TEM images of the products that are obtained as injection of S solution at 220 °C and annealing at 200 °C for 60 min. There are some big particles loaded on the nanosheets, which leads from the nonuniform FeS<sub>2</sub> nuclei.

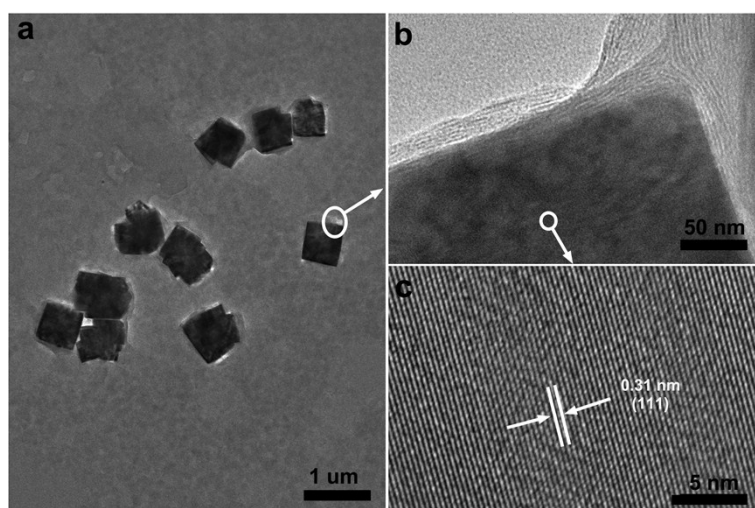

**Figure S11.** TEM (a, b) and HRTEM (c) images of the products that are prepared as injection of S solution at 240 °C and annealing at 200 °C for 60 min. Besides nanosheets, big cubic crystals are also produced. HRTEM shows the lattice fringe spacing of 0.31 nm, corresponding to the (111) plane of cubic FeS<sub>2</sub>.

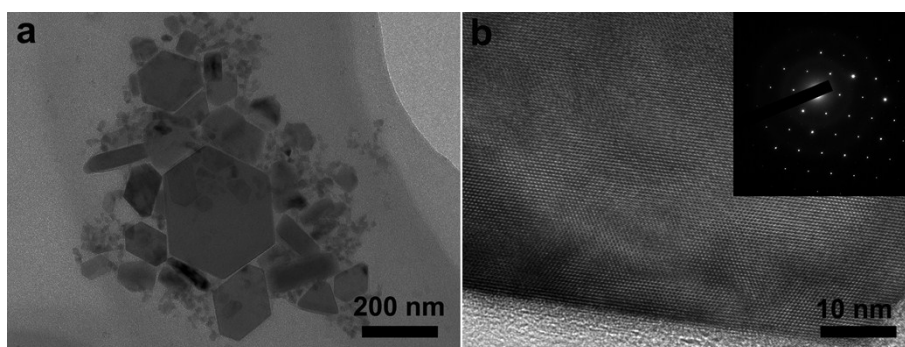

**Figure S12.** TEM (a) and HRTEM (b) images of the products that are prepared with the ODA/OLA volume ratio of 1/3. Inset in (b): the corresponding SAED pattern.



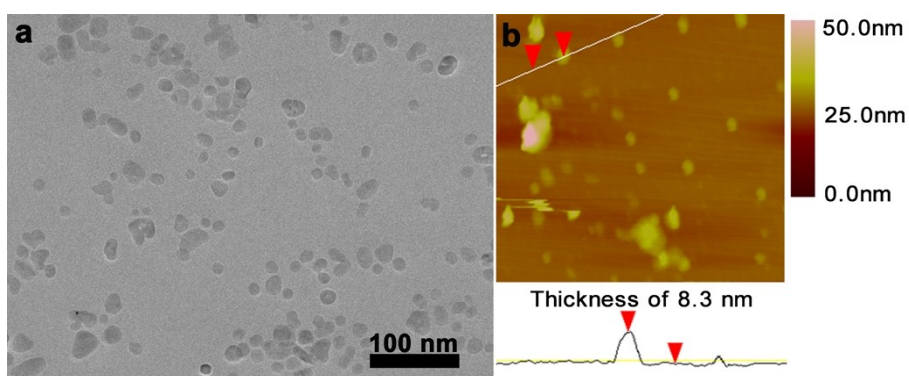

**Figure S13.** TEM (a) and AFM (b) images of big FeS<sub>2</sub> NPs. The average diameter of the NPs is 8.3 nm.

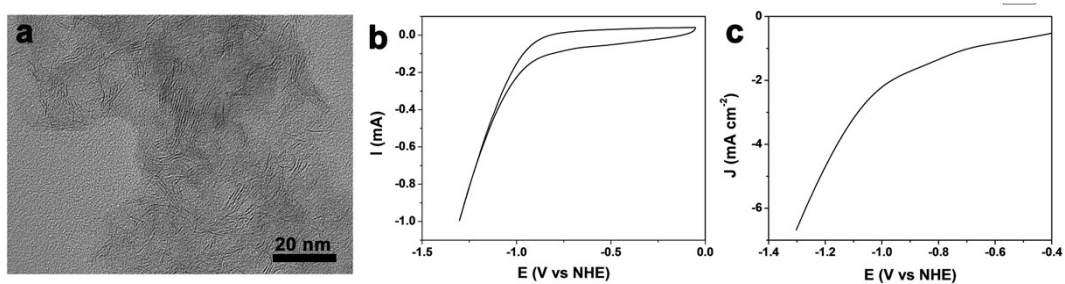

**Figure S14.** TEM image (a), cyclic voltammogram (b) and linear sweep voltammetry (c) curves of the edge-rich  $2H$ - $\text{MoS}_2$  ultrathin nanosheets. At the overpotential of 1.2 V (vs NHE), the current density is 4.7  $\text{mA/cm}^2$ .

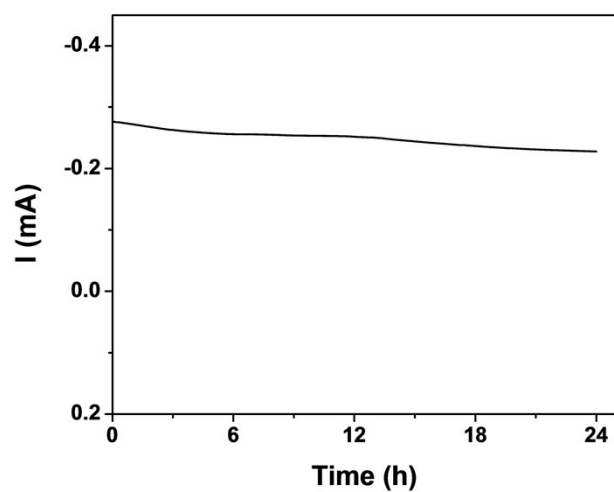

**Figure S15.** Current vs time profile for a 24 h constant potential (-1.0 V vs NHE), which indicates the good stability of the FeS<sub>2</sub> nanosheets.
